# Supplementary material
Source: publisher figshare collection journal article supplement (https://gsajournals.figshare.com/ndownloader/files/22291743)
Supplement: Supplementary file 1 [file 22291743]

**Table S6. Putatively secreted proteins are transcribed during manipulation, but many genes lack functional PFAM domain annotation.**

|  | **SignalP** | | **SSP** | |
| --- | --- | --- | --- | --- |
|  | **Total** | **PFAM** | **Total** | **PFAM** |
| **Genome** | 801 | 409 | 271 | 52 |
| **Upregulated** | 77 | 39 | 31 | 6 |
| **Upregulated from culture** | 239 | 129 | 85 | 19 |
